# Supplementary material for: Vertically-aligned Co3O4 arrays on Ni foam as monolithic structured catalysts for CO oxidation: effects of morphological transformation
Source: Royal Society of Chemistry journal article supplement (doi:10.1039/c8nr00147b), 2018-01-01
Supplement: c8nr00147b1.pdf [file c8nr00147b1.pdf]

## Supplementary material

Vertically-aligned  $\text{Co}_3\text{O}_4$  arrays on Ni foam as monolithic  
structured catalysts for CO oxidation: Effect of morphological  
transformation

Shengpeng Mo,<sup>a,b</sup> Shuangde Li,<sup>b</sup> Quanming Ren,<sup>a</sup> Yuhai Sun,<sup>a</sup>  
Bangfen Wang,<sup>a</sup> Zhentao Feng,<sup>a</sup> Qi Zhang,<sup>a</sup> Yunfa Chen<sup>b,c</sup> \* and Daiqi  
Ye<sup>a,d,e</sup> \*

<sup>a</sup> School of Environment and Energy, South China University of Technology, Guangzhou 510006,  
China

<sup>b</sup> State Key Laboratory of Multi-phase Complex Systems, Institute of Process Engineering, Chinese  
Academy of Sciences, Beijing 100190, PR China

<sup>c</sup> Center for Excellence in Urban Atmospheric Environment, Institute of Urban Environment,  
Chinese Academy of Sciences, Xiamen 361021, PR China

<sup>d</sup> Guangdong Provincial Key Laboratory of Atmospheric Environment and Pollution Control  
(SCUT), Guangzhou 510006, China

<sup>e</sup> Guangdong Provincial Engineering and Technology Research Centre for Environmental Risk  
Prevention and Emergency Disposal, South China University of Technology, Guangzhou Higher  
Education Mega Centre, Guangzhou 510006, China

\* Corresponding author at: School of Environment and Energy, South China University of  
Technology, Guangzhou 510006, China;

E-mail address: yfchen@ipe.ac.cn, chenylf@ipe.ac.cn.

\* *State Key Laboratory of Multi-phase Complex Systems, Institute of Process Engineering,  
Chinese Academy of Sciences, Beijing 100190, PR China.*

*E-mail address: cedqye@scut.edu.cn (D. Ye).*

## **Experimental Section**

***Synthesis of Co<sub>3</sub>O<sub>4</sub> NAs-NC on Ni foam:*** All the purchased chemicals were analytical grade and used without further purification. In a typical synthesis process, the Ni foams (approximately 5 cm x 7 cm, thickness 1.6 mm and pore density 110 ppi) were cleaned by a 3 M HCl aqueous solution, ethanol and deionized (DI) water with assistance of ultrasonication and for 15 min to remove the surface dirt, grease and NiO layer. Then, the cleaned Ni foam was put against the 50.0 mL Teflon-lined autoclave which contained a homogeneous solution of Co(NO<sub>3</sub>)<sub>2</sub>·6H<sub>2</sub>O (4 mmol), urea (8 mmol) and 40 ml DI water. The autoclave was sealed and maintained at 95°C for 8 h to synthesize the Co<sub>3</sub>O<sub>4</sub> nanoarrays (NAs) precursors in an electric oven. After the autoclave was cooled down to room temperature, the samples were rinsed several times with the assistance of ultrasonication and dried in air at 80 °C. Finally, the Ni foam with the as-grown precursors was put into a quartz tube and then annealed at 400°C for 2 h to obtain monolithic structured Co<sub>3</sub>O<sub>4</sub> nanoarrays catalysts. The as-prepared catalyst was denoted as NAs-NC.

***Synthesis of Co<sub>3</sub>O<sub>4</sub> NAs-CTAB on Ni foam:*** The cleaned Ni foam was put against the 50.0 mL Teflon-lined autoclave which contained a homogeneous solution of Co(NO<sub>3</sub>)<sub>2</sub>·6H<sub>2</sub>O (4 mmol), 0.3g cetyl trimethylammonium bromide (CTAB), urea (8 mmol) and 40 ml DI water. The autoclave was sealed and maintained at 95 °C for 8 h to synthesize the Co<sub>3</sub>O<sub>4</sub> nanoarrays (NAs) precursors in an electric oven. After the autoclave was cooled down to room temperature, the samples were rinsed several times with the assistance of ultrasonication and dried in air at 80 °C. Finally, the Ni foam with the as-grown precursors was put into a quartz tube and then annealed at 400°C for 2 h to obtain monolithic structured Co<sub>3</sub>O<sub>4</sub> nanoarrays catalysts. The as-prepared catalyst was denoted as NAs-CTAB.

***Synthesis of Co<sub>3</sub>O<sub>4</sub> NAs-8-CTAB on Ni foam:*** The cleaned Ni foam was put against the 50.0 mL Teflon-lined autoclave which contained a homogeneous solution of Co(NO<sub>3</sub>)<sub>2</sub>·6H<sub>2</sub>O (4 mmol),

0.3g cetyl trimethylammonium bromide (CTAB),  $\text{NH}_4\text{F}$  (8 mmol), urea (8 mmol) and 40 ml DI water. The autoclave was sealed and maintained at  $95^\circ\text{C}$  for 8 h to synthesize the  $\text{Co}_3\text{O}_4$  nanoarrays (NAs) precursors in an electric oven. After the autoclave was cooled down to room temperature, the samples were rinsed several times with the assistance of ultrasonication and dried in air at  $80^\circ\text{C}$ . Finally, the Ni foam with the as-grown precursors was put into a quartz tube and then annealed at  $400^\circ\text{C}$  for 2 h to obtain monolithic structured  $\text{Co}_3\text{O}_4$  nanoarrays catalysts. The as-prepared catalyst was denoted as NAs-8-CTAB.

**Materials Characterizations:** X-ray powder diffraction (XRD) patterns of the monolithic structured samples were recorded on a Panalytical X'Pert PRO system with  $\text{Cu-K}\alpha$  ( $\lambda=1.5406\text{\AA}$ ) radiation at a scan rate of  $10/\text{min}^{-1}$  within the range of scattering angle  $2\theta$  of  $5$  to  $90^\circ$ , operated at  $40\text{kv}$  and  $40\text{mA}$ .  $\text{N}_2$  adsorption/desorption isotherms were obtained via  $\text{N}_2$  adsorption at  $-196^\circ\text{C}$  on an automatic surface analyzer (SSA-7300, China). The BET specific surface area was obtained according to the Brunauer–Emmett–Teller (BET). The size and morphology of samples were characterized using field-emission scanning electron microscopy (FESEM, JEOL JSM-6700F) with an acceleration voltage of  $15\text{ kV}$ ,  $10\text{mM}$ . The microstructures of samples were obtained using transmission electron microscopy (TEM, JEOLJEM-2010F) with an accelerating voltage of  $200\text{ kV}$ . The reduction behavior of the samples was studied by the temperature-programmed reduction of hydrogen ( $\text{H}_2$ -TPR) with Automated Catalyst Characterization System (Autochem 2920, MICROMERITICS) equipped with thermal conductivity detector (TCD). The monolithic structured  $\text{Co}_3\text{O}_4$  NAs sample ( $1\text{ cm} \times 2\text{cm} \times 1.6\text{ mm}$ ) was placed in a quartz reactor under a gas flow ( $10\% \text{H}_2/\text{Ar}$ ,  $25\text{ ml min}^{-1}$ ) with a constant rate of  $10^\circ\text{C min}^{-1}$  up to  $800^\circ\text{C}$ . The Raman spectra of the monolithic samples were conducted on a Renishaw RM2000 Raman Spectrometer (laser wavelength =  $532\text{ nm}$ ). Surface species of the catalysts were characterized by X-ray photoelectron spectroscopy (XPS) using an XLESCALAB 250Xi electron spectrometer from VG Scientific with monochromatic  $\text{Al K}\alpha$  radiation, and the binding energies of elements were calibrated based on the  $\text{C } 1\text{s}$  peaks at  $284.6\text{ eV}$ .

The in-situ Raman experiment (laser wavelength =  $532\text{ nm}$ ) was designed as shown in **FigureS1**, and the spectra was achieved at every  $10^\circ\text{C}$  from  $25^\circ\text{C}$  to  $200^\circ\text{C}$  under  $\text{N}_2$ ,  $20\% \text{O}_2/\text{N}_2$ , and  $20\% \text{O}_2/\text{N}_2/\text{CO}$  ( $1\text{vol.}\%$ ) respectively.  $\text{N}_2$  was used as inert gas to flush the sample after treatment in active atmosphere. The dry air ( $\text{O}_2/\text{N}_2$ ) was aimed to investigate the oxygen

replenishment ability of the catalysts, which adsorbed gaseous oxygen and transformed it into active oxygen species. The O<sub>2</sub>/N<sub>2</sub>/CO mixture was put into the cell to get the surface oxygen vacancies concentration under reaction condition. It would take 45 min to start one temperature point to the next: 20 min for temperature stabilization, followed by 20 min for Raman analysis, and the last 5 min for heating to the next temperature with a ramp rate of 2 °C min<sup>-1</sup>).

**Catalytic activity measurements:** the as-prepared Co<sub>3</sub>O<sub>4</sub> catalysts (1 cm × 2 cm × 1.6 mm) buckling into a cylinder were evaluated in a fixed-bed quartz tubular micro-reactor (φ= 6 mm) with quartz wool packed at both ends of the catalyst bed (gas hourly space velocity = 20,000 h<sup>-1</sup>). The reactant gas composed of 1 vol.% gaseous CO balanced with air (20 vol.% O<sub>2</sub> + balance N<sub>2</sub>) was purged into the reactor at a flow rate of 100 mL min<sup>-1</sup>. After reacted at the final temperature for 1 h, the concentrations of effluent gases were analyzed on-line by a gas chromatograph (Shimadzu GC-2014) equipped with a thermal conductivity detector (TCD). The catalytic activities over the monolithic structured Co<sub>3</sub>O<sub>4</sub> NAs catalysts were calculated on the basis of the concentration change of CO.

$$\eta_{\text{CO}} = \frac{C_{\text{CO,in}} - C_{\text{CO,out}}}{C_{\text{CO,in}}} \times 100\%$$

Where  $\eta_{\text{CO}}$ ,  $C_{\text{CO, in}}$  (ppm) and  $C_{\text{CO, out}}$  (ppm) are the CO conversion, CO in the inlet and outlet gas, respectively.

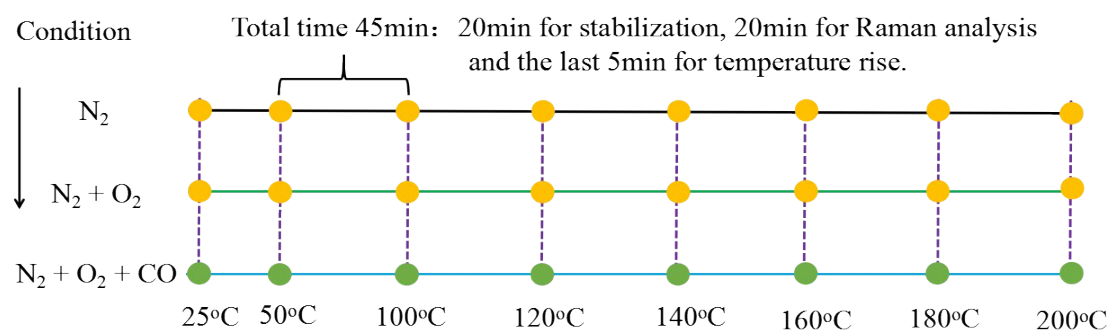

**Figure S1.** Experimental scheme for *in-situ* Raman experiment.

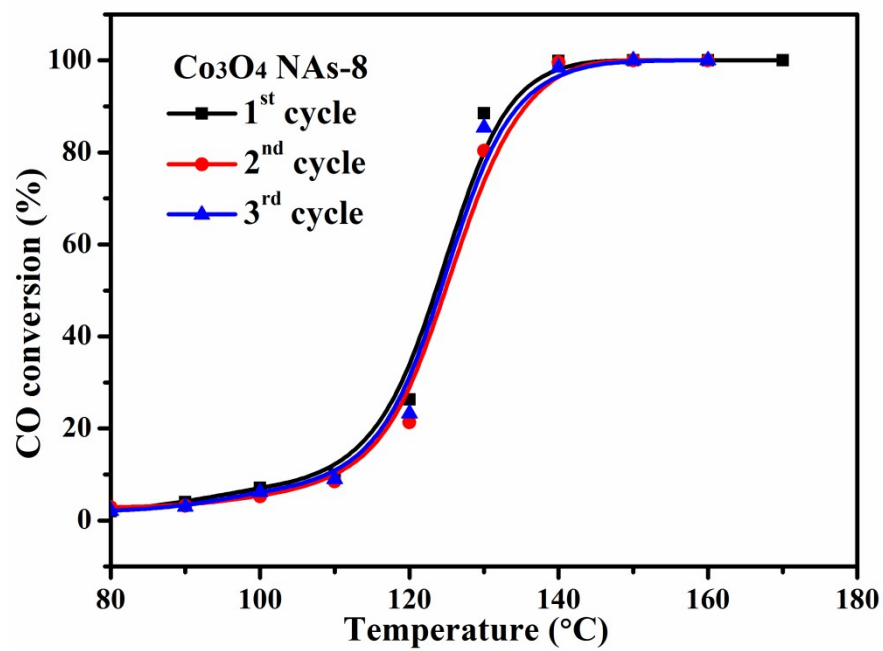

Figure S2. The recycle test of Co<sub>3</sub>O<sub>4</sub> NAs-8.

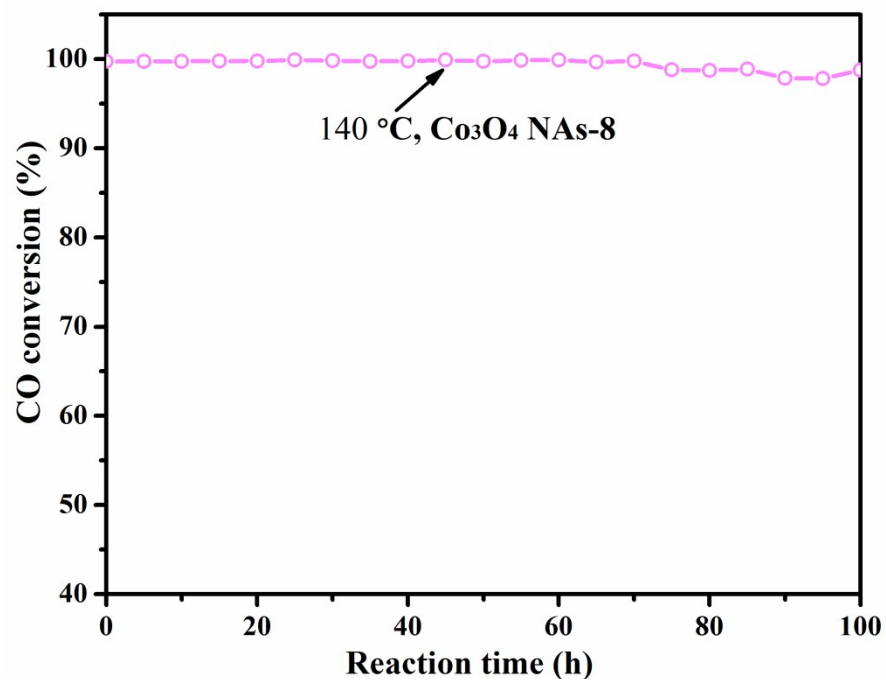

**Figure S3.**The stability test of Co<sub>3</sub>O<sub>4</sub> NAs-8.
